# Supplementary material
Source: PubMed Central journal article supplement (PMC2830840)

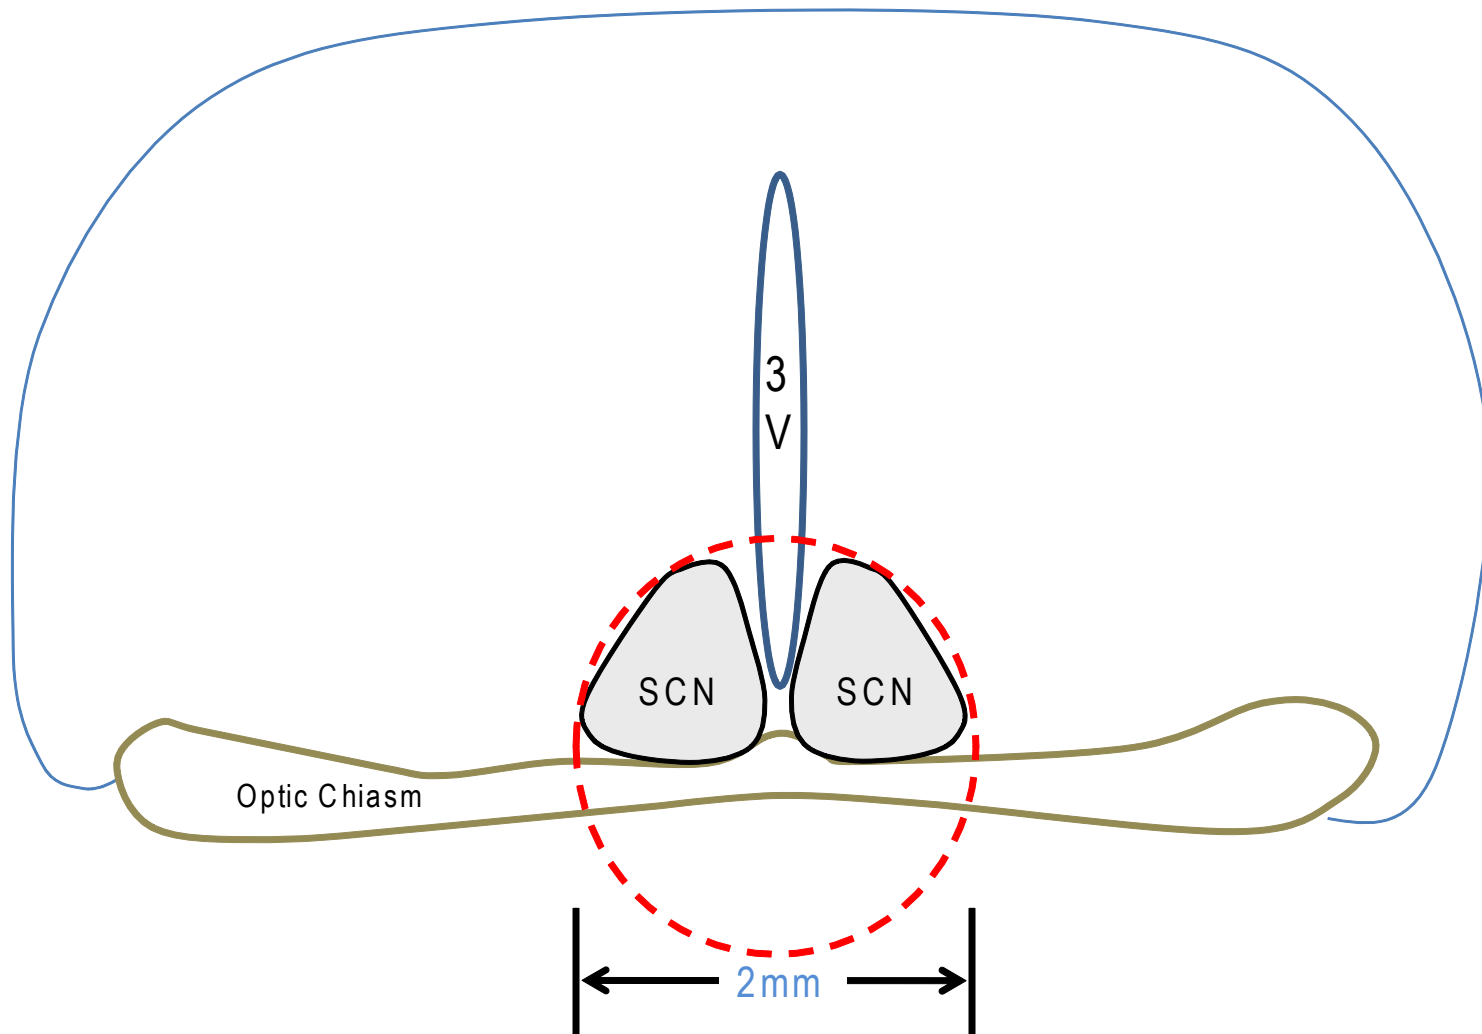

Supplement: supp_M900362-MCP200_supplemental_fig1.pdf [file supp_M900362-MCP200_supplemental_fig1.pdf]
